# Supplementary material
Source: publisher figshare collection journal article supplement (https://frontiersin.figshare.com/ndownloader/files/35498081)
Supplement: Supplementary file [file 35498081]

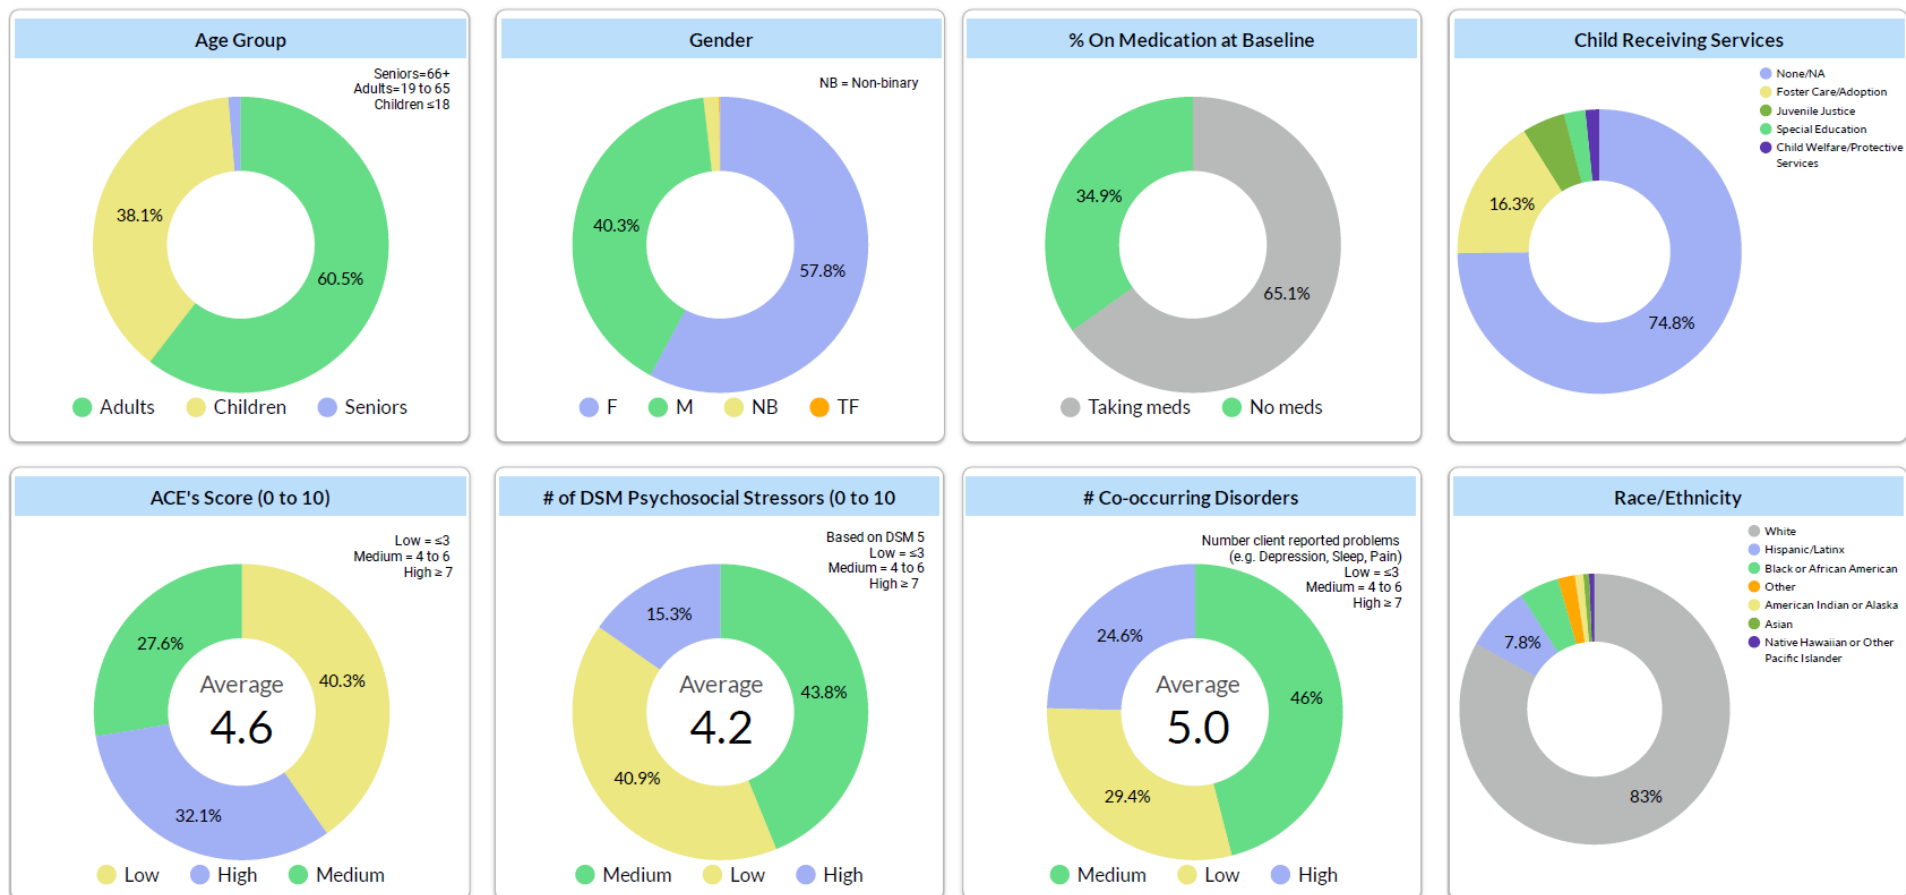

**Supplementary Figure 1. Participant Demographics**

Reported demographic measures for clients include age group, gender, percentage of clients taking medications at baseline, children receiving services (foster care, juvenile justice, special education, child welfare/protective services), ACE's scores, number of DSM psychosocial stressors, number of co-occurring disorders, and race/ethnicity.
